# Supplementary material for: Some Aspects of Bamboo Inventory
Source: MDPI journal article supplement (doi:10.3390/ma14195551), 1974-09-01
Supplement: s1 [file s1]

Supplementary Material

# High-Performance Washable PM<sub>2.5</sub> Filter Fabricated with Laser-Induced Graphene

Anh-Phan Nguyen <sup>1</sup>, Won-Kyu Kang <sup>2</sup>, Jungbae Lee <sup>2</sup> and Jung-Bin In <sup>1,2,\*</sup>

<sup>1</sup> Department of Intelligent Energy and Industry, Chung-Ang University, Seoul 06974, Korea; anhpn@cau.ac.kr

<sup>2</sup> Soft Energy Systems and Laser Applications Laboratory, School of Mechanical Engineering, Chung-Ang University, Seoul 06974, Korea; zk273rvlb@cau.ac.kr (W.-K.K.); skzzjd@cau.ac.kr (J.L.)

\* Correspondence: jbin@cau.ac.kr

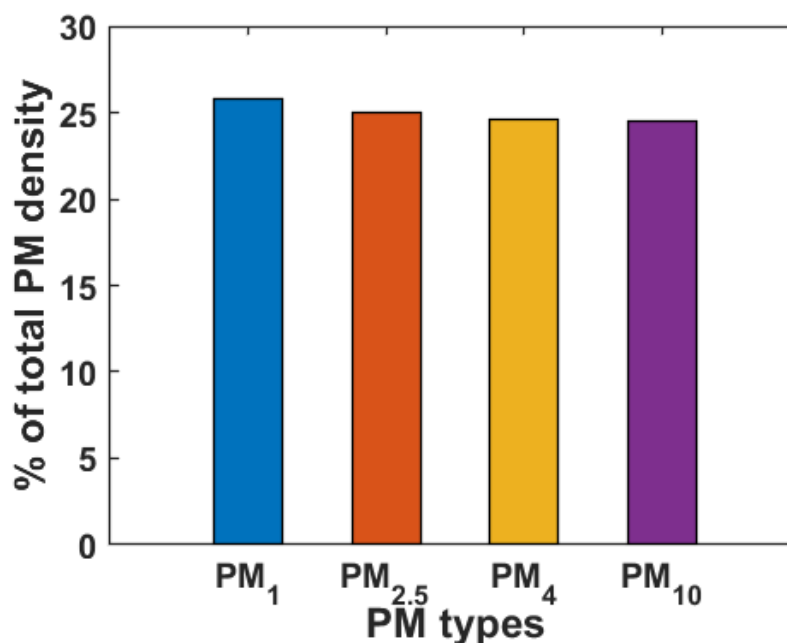

**Figure S1.** Composition of generated PM (after dilution).

**Citation:** Nguyen, A.-P.; Kang, W.-K.; Lee, J.; In, J.-B. High-Performance Washable PM<sub>2.5</sub> Filter Fabricated with Laser-Induced Graphene. *Materials* **2021**, *14*, 5551. <https://doi.org/10.3390/ma14195551>

Academic Editor: Wiesław Stręk

Received: 27 August 2021

Accepted: 21 September 2021

Published: 24 September 2021

**Publisher's Note:** MDPI stays neutral with regard to jurisdictional claims in published maps and institutional affiliations.

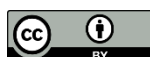

**Copyright:** © 2021 by the authors. Submitted for possible open access publication under the terms and conditions of the Creative Commons Attribution (CC BY) license (<http://creativecommons.org/licenses/by/4.0/>).

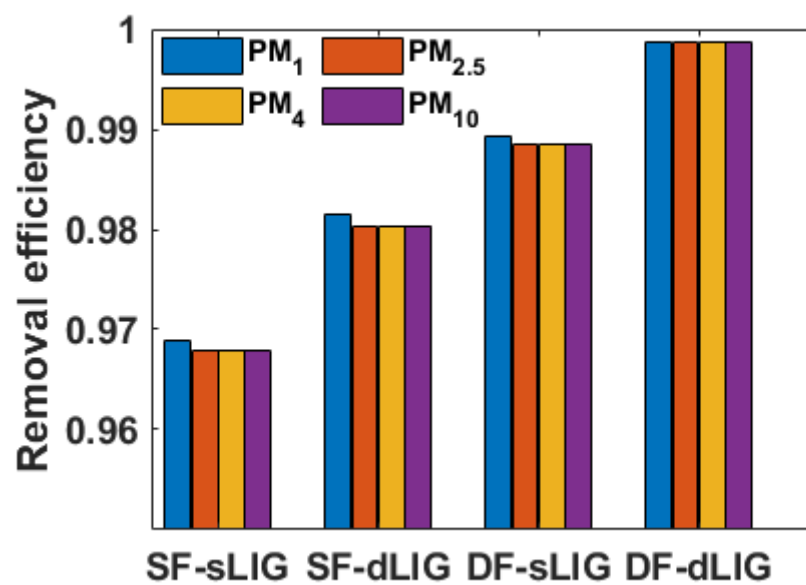

Figure S2. Collection efficiency of different filters for different PM sizes, with 12 V bias voltage.

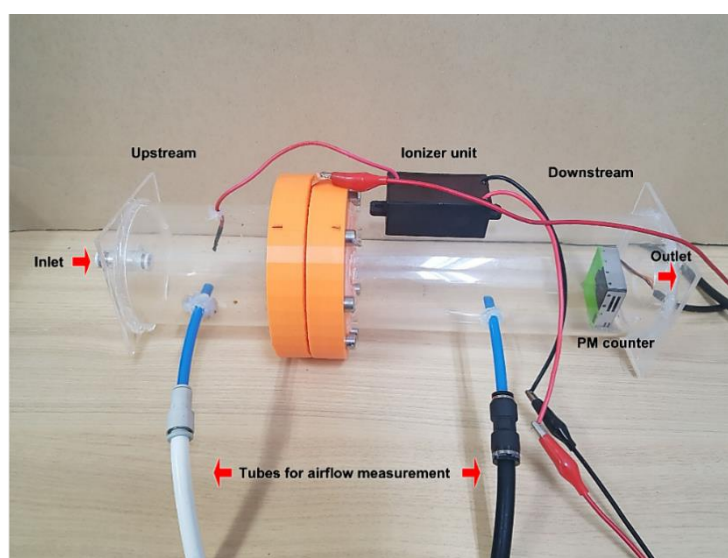

Figure S3. Digital image of the air filtration setup.
